# Supplementary material for: Gray matter covariations in autism: out-of-sample replication using the ENIGMA autism cohort
Source: PubMed Central journal article supplement (PMC10792893; doi:10.1186/s13229-024-00583-8), 2024-01-17
Supplement: 13229_2024_583_MOESM1_ESM.pdf [file 13229_2024_583_MOESM1_ESM.pdf]

## Supplementary Information

### Gray Matter Covariations in Autism. Out of Sample Replication Using the ENIGMA-autism Cohort

#### Contents

|                                                                            |   |
|----------------------------------------------------------------------------|---|
| 1. Table S1. Acquisition Parameters in Each Site .....                     | 2 |
| 2. Site Effect Removal Using ComBat and GLM .....                          | 3 |
| 3. Table S2. Demographic Information of the Sample in Each Site .....      | 4 |
| 4. Comparison of the ICs between Groups in Each Site.....                  | 6 |
| 5. Table S4. Comparison of Descriptive between ENIGMA and LEAP Sample..... | 7 |

**1. Table S1. Acquisition Parameters in Each Site**

| Site           | Field Strength | Coverage | Slices | Voxel Size(mm) | TE    |
|----------------|----------------|----------|--------|----------------|-------|
| NIJMEGEN3      | 1.5T           | 256x256  | 176    | 1x1x1          | 2.3   |
| BRC            | 3T             | 256x256  | 166    | 1x1x1          | NA    |
| PITT           | 3T             | 256x256  | 176    | 1.05x1.05x1.05 | 3.9   |
| OHSU           | 3T             | 256x240  | 160    | 1x1x1          | NA    |
| ABIDE_CALTECH  | 3T             | 256x256  | 176    | 1x1x1          | 2.73  |
| ABIDE_KKI      | 3T             | 256x256  | 200    | 1x1x1          | 3.7   |
| ABIDE_LEUVEN_1 | 3T             | 256x256  | 182    | 1x1x1          | 4.6   |
| ABIDE_MAX_MUN  | 3T             | 256x256  | 160    | 1x1x1          | 3.06  |
| ABIDE_NYU      | 3T             | 256x256  | 128    | 1.3x1x1.3      | 3.25  |
| ABIDE_OHSU     | 3T             | 256x256  | 160    | 1x1x1.1        | 3.58  |
| ABIDE_OLIN     | 3T             | 256x256  | 176    | 1x1x1          | 2.74  |
| ABIDE_PITT     | 3T             | 269x269  | 176    | 1x1x1          | 3.93  |
| ABIDE_SDSU     | 3T             | 256x256  | 180    | 1x1x1          | 4.3   |
| ABIDE_STANFORD | 3T             | 256x256  | 132    | 0.9x0.9x1      | 1.8   |
| ABIDE_UM_1     | 3T             | 256x256  | 128    | 1x1x1          | 1.8   |
| ABIDE_UM_2     | 3T             | 256x256  | 128    | 1x1x1          | 1.8   |
| ABIDE_USM      | 3T             | 256x240  | 192    | 1x1x1.2        | 2.91  |
| ABIDE_YALE     | 3T             | 256x256  | 160    | 1x1x1          | 1.73  |
| ABIDEII-BNI_1  | 3T             | 244x227  | 170    | 1.11x1.11x1.2  | 3.1   |
| ABIDEII-ETH_1  | 3T             | 256x256  | 162    | 0.89x0.89x0.89 | 3.9   |
| ABIDEII-GU_1   | 3T             | 256x256  | 176    | 1x1x1          | 3.5   |
| ABIDEII-IP_1   | 1.5T           | 256x256  | 170    | 1x1x1          | 5.6   |
| ABIDEII-IU_1   | 3T             | 256x256  | 180    | 0.7x0.7x0.7    | 2.3   |
| ABIDEII-KKI_1  | 3T             | 256x200  | 200    | 1x1x1          | 3.7   |
| ABIDEII-KUL_3  | 3T             | 256x256  | 182    | 1.2x1.2x1.2    | 4.6   |
| ABIDEII-NYU_1  | 3T             | 256x256  | 128    | 1.3x1x1.3      | 3.25  |
| ABIDEII-NYU_2  | 3T             | 256x256  | 128    | 1.3x1x1.3      | 3.25  |
| ABIDEII-OHSU_1 | 3T             | 256x256  | 160    | 1x1x1.1        | 3.58  |
| ABIDEII-OILH_2 | 3T             | 256x256  | 208    | 0.8x0.8x0.8    | 2.88  |
| ABIDEII-SDSU_1 | 3T             | 256x192  | 176    | 1x1x1          | 3.172 |
| ABIDEII-TCD_1  | 3T             | 256x256  | 190    | 0.9x0.9x0.9    | 3.9   |
| ABIDEII-UCD_1  | 3T             | 256x256  | 192    | 1x1x1          | 3.16  |
| ABIDEII-UCLA_1 | 3T             | 256x240  | 160    | 1x1x1.2        | 2.86  |
| ABIDEII-USM_1  | 3T             | 256x256  | 220    | 1x1x1          | NA    |

## 2. Site Effect Removal Using ComBat and GLM

We first attempted to remove the site effects by using ComBat, and by just adding site as a covariate in the GLM. The site removal effects were shown in Figure S1, which shows the density plots of participant loadings before and after controlling for site while using either a ComBat + GLM model or GLM alone. Both approaches effectively removed the site effect. The site effect was found significantly on the participant loadings of E-IC1 and E-IC2 while controlling for group, age, sex and IQ ( $p < 0.001$ ). ComBat (on E-IC1:  $p = 0.999$ , on E-IC2:  $p = 0.868$ ) and GLM (on E-IC1:  $p = 0.999$ , on E-IC2:  $p = 0.999$ ) were demonstrated effectively removing the site effect.

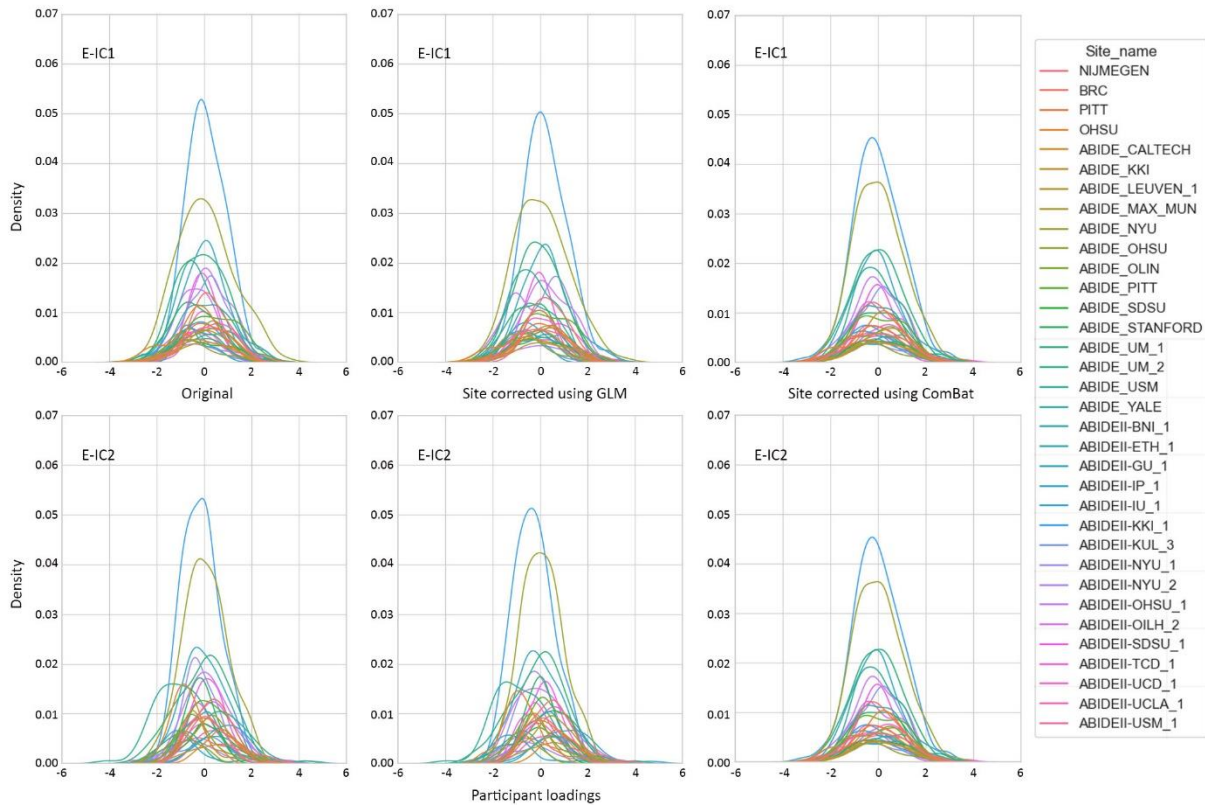

**Figure S1.** The kernel density estimation plot of participant loadings of each site before and after controlling for site separately using GLM and ComBat. E-IC, independent component of ENIGMA; L-IC, independent component of LEAP.

**3. Table S2. Demographic Information of the Sample in Each Site**

| Site           | Autism   |                |        |                |                |                 | Controls |                |        |                |
|----------------|----------|----------------|--------|----------------|----------------|-----------------|----------|----------------|--------|----------------|
|                | <i>n</i> | Age (mean, SD) | Female | IQ (mean, SD)  | ADOS, <i>n</i> | ADOS (mean, SD) | <i>n</i> | Age (mean, SD) | Female | IQ (mean, SD)  |
| NIJMEGEN3      | 17       | 23.82 (3.99)   | 47.06% | 117.76 (12.84) | -              | -               | 15       | 22.27 (3.06)   | 40.00% | 117.87 (12.49) |
| BRC            | 19       | 15.00 (1.94)   | -      | 113.53 (15.68) | 17             | 9.59 (5.03)     | 31       | 14.26 (2.63)   | 0.00%  | 110.26 (11.86) |
| PITT           | 17       | 15.18 (4.17)   | 11.76% | 110.76 (9.32)  | 17             | 12.00 (3.74)    | 18       | 14.61 (3.96)   | 16.67% | 109.94 (10.65) |
| OHSU           | 17       | 11.08 (2.21)   | 11.76% | 104.47 (18.48) | 10             | 6.60 (2.01)     | 28       | 10.93 (1.18)   | 28.57% | 112.79 (14.76) |
| ABIDE_CALTECH  | 10       | 22.69 (3.48)   | 10.00% | 108.20 (12.20) | 10             | 11.60 (3.53)    | 11       | 22.95 (3.12)   | 36.36% | 116.09 (10.34) |
| ABIDE_KKI      | 7        | 10.07 (1.13)   | -      | 99.71 (16.37)  | 7              | 12.14 (3.02)    | 13       | 10.45 (1.46)   | 23.08% | 113.46 (9.71)  |
| ABIDE_LEUVEN_1 | 12       | 21.00 (3.13)   | -      | 111.83 (12.32) | -              | -               | 14       | 23.29 (3.02)   | -      | 115.00 (13.32) |
| ABIDE_MAX_MUN  | 15       | 16.87 (8.37)   | 6.67%  | 105.00 (13.91) | 6              | 9.50 (3.56)     | 22       | 21.55 (7.14)   | 4.55%  | 112.73 (8.72)  |
| ABIDE_NYU      | 74       | 13.86 (5.92)   | 13.51% | 107.66 (16.90) | 74             | 11.15 (3.84)    | 100      | 16.08 (5.94)   | 26.00% | 113.37 (13.32) |
| ABIDE_OHSU     | 7        | 10.85 (1.31)   | -      | 95.73 (20.47)  | 7              | 8.57 (3.41)     | 10       | 9.70 (.98)     | -      | 115.87 (12.03) |
| ABIDE_OLIN     | 18       | 16.33 (3.12)   | 11.11% | 113.00 (17.87) | 18             | 14.11 (3.91)    | 16       | 16.94 (3.68)   | 12.50% | 114.94 (16.54) |
| ABIDE_PITT     | 24       | 17.04 (4.70)   | 16.67% | 108.46 (13.31) | 21             | 12.90 (3.05)    | 25       | 17.73 (5.41)   | 16.00% | 109.72 (9.46)  |
| ABIDE_SDSU     | 3        | 13.84 (1.64)   | -      | 120.67 (7.57)  | 3              | 13.33 (5.13)    | 21       | 14.09 (1.85)   | 23.81% | 107.67 (10.56) |
| ABIDE_STANFORD | 23       | 17.20 (3.63)   | -      | 108.87 (15.26) | 23             | 10.65 (2.89)    | 29       | 16.17 (4.20)   | -      | 111.14 (12.09) |
| ABIDE_UM_1     | 54       | 12.57 (2.98)   | 20.37% | 100.75 (17.41) | 8              | 14.25 (4.23)    | 54       | 12.88 (3.38)   | 35.19% | 109.52 (10.14) |
| ABIDE_UM_2     | 11       | 14.34 (1.98)   | -      | 106.77 (18.24) | 2              | 18.00 (2.83)    | 12       | 16.33 (3.61)   | 8.33%  | 110.17 (9.97)  |
| ABIDE_USM      | 49       | 19.04 (5.21)   | -      | 99.41 (15.29)  | 49             | 12.98 (3.58)    | 34       | 19.43 (5.88)   | -      | 114.21 (14.74) |
| ABIDE_YALE     | 27       | 12.61 (3.01)   | 29.63% | 96.56 (19.21)  | 1              | 11.00 (-)       | 27       | 12.69 (2.80)   | 29.63% | 105.00 (17.72) |
| ABIDEII-BNI_1  | 13       | 20.77 (2.20)   | -      | 104.38 (15.33) | 12             | 11.33 (3.96)    | 10       | 20.80 (2.57)   | -      | 111.80 (10.32) |
| ABIDEII-ETH_1  | 11       | 20.56 (3.71)   | -      | 107.55 (13.49) | 10             | 9.00 (1.94)     | 24       | 23.88 (4.50)   | -      | 116.50 (9.48)  |
| ABIDEII-GU_1   | 44       | 11.01 (1.51)   | 15.91% | 119.27 (14.81) | 33             | 10.64 (4.31)    | 51       | 10.45 (1.74)   | 50.98% | 121.63 (13.37) |
| ABIDEII-IP_1   | 15       | 15.36 (4.63)   | 33.33% | 96.07 (22.93)  | 15             | 13.87 (4.56)    | 4        | 9.29 (.83)     | 75.00% | 101.25 (25.70) |
| ABIDEII-IU_1   | 17       | 21.59 (3.30)   | 11.76% | 115.76 (12.81) | 17             | 8.82 (2.16)     | 17       | 21.94 (2.05)   | 29.41% | 115.76 (9.88)  |
| ABIDEII-KKI_1  | 53       | 10.34 (1.54)   | 26.42% | 104.40 (15.19) | 19             | 13.95 (3.31)    | 145      | 10.35 (1.19)   | 35.86% | 114.47 (10.71) |
| ABIDEII-KUL_3  | 23       | 22.39 (3.31)   | -      | 108.00 (15.91) | 23             | 8.48 (3.86)     | -        | -              | -      | -              |
| ABIDEII-NYU_1  | 37       | 10.22 (4.70)   | 8.11%  | 101.51 (19.80) | 30             | 9.33 (3.09)     | 25       | 10.03 (3.37)   | 4.00%  | 117.52 (14.51) |
| ABIDEII-NYU_2  | 19       | 7.31 (0.78)    | 10.53% | 104.37 (14.29) | 1              | 14.00 (-)       | -        | -              | -      | -              |

**Table S2. Demographic Information of the Sample in Each Site (Continued)**

| Site           | Autism   |                   |        |                |                   |                    | Controls |                   |        |                |
|----------------|----------|-------------------|--------|----------------|-------------------|--------------------|----------|-------------------|--------|----------------|
|                | <i>n</i> | Age<br>(Mean, SD) | Female | IQ (Mean, SD)  | ADOS,<br><i>n</i> | ADOS<br>(Mean, SD) | <i>n</i> | Age<br>(Mean, SD) | Female | IQ (Mean, SD)  |
| ABIDEII-OHSU_1 | 26       | 12.50 (1.88)      | 19.23% | 106.46 (17.65) | -                 | -                  | 50       | 10.22 (1.63)      | 52.00% | 117.72 (11.93) |
| ABIDEII-OILH_2 | 21       | 21.38 (3.22)      | 14.29% | 113.38 (16.66) | 21                | 9.43 (2.01)        | 34       | 24.03 (3.68)      | 41.18% | 111.97 (12.18) |
| ABIDEII-SDSU_1 | 31       | 13.24 (3.07)      | 22.58% | 99.48 (14.86)  | -                 | -                  | 24       | 13.13 (3.04)      | 8.33%  | 103.29 (11.86) |
| ABIDEII-TCD_1  | 17       | 14.40 (3.29)      | -      | 108.94 (15.69) | 17                | 8.71 (2.37)        | 21       | 15.65 (3.12)      | -      | 116.29 (12.91) |
| ABIDEII-UCD_1  | 16       | 14.95 (1.96)      | 18.75% | 104.00 (12.81) | 1                 | 8.00 (-)           | 14       | 14.80 (1.71)      | 28.57% | 113.00 (11.23) |
| ABIDEII-UCLA_1 | 12       | 12.02 (2.23)      | 8.33%  | 104.33 (12.94) | 8                 | 12.88 (2.70)       | 13       | 9.99 (2.30)       | 38.46% | 113.77 (14.21) |
| ABIDEII-USM_1  | 11       | 17.90 (5.16)      | 18.18% | 97.45 (19.78)  | 6                 | 15.50 (4.32)       | 12       | 22.38 (5.92)      | 25.00% | 116.67 (15.56) |

#### 4. Comparison of the ICs between Groups in Each Site

**Table S3.** Comparison between Autism and Control Group in Each Site

| Sites          | E-IC1         |                          | E-IC2        |                          | Sites          | E-IC1    |                | E-IC2        |                |
|----------------|---------------|--------------------------|--------------|--------------------------|----------------|----------|----------------|--------------|----------------|
|                | <i>t</i>      | <i>p</i> value           | <i>t</i>     | <i>p</i> value           |                | <i>t</i> | <i>p</i> value | <i>t</i>     | <i>p</i> value |
| NIJMEGEN       | 0.180         | 0.858                    | -0.564       | 0.577                    | ABIDE_YALE     | -1.932   | 0.059          | 1.464        | 0.149          |
| BRC            | -0.819        | 0.417                    | -0.361       | 0.720                    | ABIDEII-BNI_1  | -0.594   | 0.559          | -0.224       | 0.825          |
| PITT           | -1.087        | 0.285                    | <b>2.302</b> | <b>0.028</b>             | ABIDEII-ETH_1  | 0.512    | 0.612          | 0.055        | 0.957          |
| OHSU           | -0.362        | 0.719                    | 0.824        | 0.415                    | ABIDEII-GU_1   | 0.229    | 0.820          | -0.121       | 0.904          |
| ABIDE_CALTECH  | 0.972         | 0.343                    | -0.221       | 0.828                    | ABIDEII-IP_1   | 0.165    | 0.871          | 1.104        | 0.285          |
| ABIDE_KKI      | 0.349         | 0.731                    | 0.279        | 0.783                    | ABIDEII-IU_1   | 0.123    | 0.903          | 0.798        | 0.431          |
| ABIDE_LEUVEN_1 | 0.752         | 0.460                    | -1.252       | 0.223                    | ABIDEII-KKI_1  | -0.441   | 0.660          | 0.503        | 0.615          |
| ABIDE_MAX_MUN  | 1.871         | 0.070                    | 1.457        | 0.154                    | ABIDEII-KUL_3  | -        | -              | -            | -              |
| ABIDE_NYU      | <b>4.499</b>  | <b><i>p</i>&lt;0.001</b> | -0.283       | 0.777                    | ABIDEII-NYU_1  | -0.083   | 0.934          | 0.360        | 0.720          |
| ABIDE_OHSU     | 0.115         | 0.910                    | 1.405        | 0.181                    | ABIDEII-NYU_2  | -        | -              | -            | -              |
| ABIDE_OLIN     | <b>4.156</b>  | <b><i>p</i>&lt;0.001</b> | 1.641        | 0.110                    | ABIDEII-OHSU_1 | 0.285    | 0.776          | <b>2.964</b> | <b>0.004</b>   |
| ABIDE_PITT     | -1.718        | 0.092                    | -1.412       | 0.165                    | ABIDEII-OILH_2 | 1.882    | 0.065          | 0.568        | 0.573          |
| ABIDE_SDSU     | <b>-2.205</b> | <b>0.038</b>             | -1.358       | 0.188                    | ABIDEII-SDSU_1 | 0.434    | 0.666          | -0.373       | 0.710          |
| ABIDE_STANFORD | <b>2.362</b>  | <b>0.022</b>             | 0.653        | 0.517                    | ABIDEII-TCD_1  | -0.881   | 0.384          | -1.453       | 0.155          |
| ABIDE_UM_1     | <b>5.369</b>  | <b><i>p</i>&lt;0.001</b> | <b>4.880</b> | <b><i>p</i>&lt;0.001</b> | ABIDEII-UCD_1  | -0.713   | 0.482          | 0.872        | 0.391          |
| ABIDE_UM_2     | -0.859        | 0.400                    | -0.489       | 0.630                    | ABIDEII-UCLA_1 | 1.484    | 0.152          | 1.275        | 0.215          |
| ABIDE_USM      | 0.042         | 0.966                    | -0.537       | 0.593                    | ABIDEII-USM_1  | 1.451    | 0.162          | 1.464        | 0.158          |

**5. Table S4. Comparison of Descriptive between ENIGMA and LEAP Sample**

|                       | ENIGMA-<br>Autism | LEAP-Autism   | Statistics               | ENIGMA-<br>Control | LEAP-Control      | Statistics               |
|-----------------------|-------------------|---------------|--------------------------|--------------------|-------------------|--------------------------|
| Diagnosis (N)         | 770               | 347           |                          | 924                | 252               |                          |
| Age (Mean, SD)        | 14.88 (5.47)      | 16.79 (5.56)  | $t=-5.374, p<0.001$      | 14.79 (5.75)       | 16.92 (5.71)      | $t=-5.207, p<0.001$      |
| IQ (Mean, SD)         | 106.20 (16.91)    | 99.40 (18.94) | $t=5.984, p<0.001$       | 113.40 (12.74)     | 104.88<br>(18.26) | $t=-6.954, p<0.001$      |
| Sex (Male,<br>Female) | 667,103           | 253, 94       | $\chi^2=30.965, p<0.001$ | 693, 231           | 163, 89           | $\chi^2=10.641, p=0.001$ |
